# Supplementary material
Source: PubMed Central journal article supplement (PMC5509503)
Supplement: NIHMS860599-supplement-supplement_1.pdf [file NIHMS860599-supplement-supplement_1.pdf]

## Supplemental Figure S1

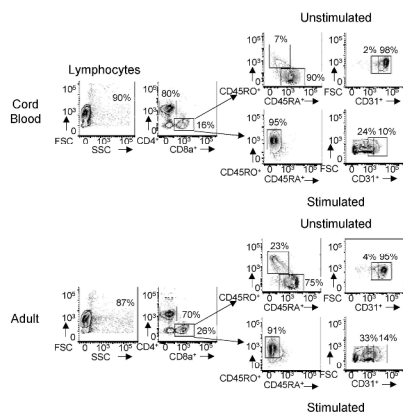

Supplemental Figure S1: Gating Strategy

Representative flow plots depicting the gating strategy for human cord blood (Top) and adult PBMCs (Bottom) for both stimulated and unstimulated samples. Lymphocytes were gated, followed by CD4<sup>+</sup> or CD8a<sup>+</sup>. Naive cells were identified by CD45RA<sup>+</sup>CD45RO<sup>-</sup>, and activated cells were identified by CD45RO<sup>+</sup>CD45RA<sup>-</sup>. Finally, these respective populations were gated on CD31.

## Supplemental Figure S1: Gating Strategy

Representative flow plots depicting the gating strategy for human cord blood (Top) and adult PBMCs (Bottom) for both stimulated and unstimulated samples. Lymphocytes were gated, followed by CD4<sup>+</sup> or CD8a<sup>+</sup>. Naive cells were identified by CD45RA<sup>+</sup>CD45RO<sup>-</sup>, and activated cells were identified by CD45RO<sup>+</sup>CD45RA<sup>-</sup>. Finally, these respective populations were gated on CD31.

123x157mm (1000 x 1000 DPI)
